# Supplementary material for: Paramedicine students’ experiences on placement: Preparedness for the emotional impacts of witnessing trauma
Source: Research Square preprint supplement (doi:10.21203/rs.3.rs-5530877/v1), 2025-04-11
Supplement: Supplementary file 1 [file 6506e8d025243704ea217a7c.docx]

My name is [ ], and I am an Honours student at Victoria University. Along with my colleague [ ], we are conducting a research project which will help universities and placement providers better understand the experiences of paramedic students on placement. The goal is to enhance the support for the wellbeing of paramedic students following critical incidents.

Today you will be participating in an audio-recorded interview, which should take approximately 30-40 minutes of your time. Participation in this interview is entirely voluntary, and participants are free to withdraw at any time without consequences. Please note that your name will not be used in the study, and all responses will be kept anonymous to ensure confidentiality. Moreover, we would like to emphasise that there are minimal risks associated with this interview. However, if you feel uncomfortable or distressed during the interview, please inform the interviewer immediately, and we will stop the interview. We can reschedule or just end it where we are. Additionally, we have provided you with referral details for additional support in the Information to Participants form. Our top priority is to ensure that your participation is safe, comfortable, and meaningful.

Do you have any questions? Do you consent to participate?

**Demographic questions:**

What is your age?

Gender?

Second year or third year student? Have you completed at least one placement experience?

**Interview questions:**

**General (both)**

1. Why did you choose paramedicine?
2. Can you describe an incident during your paramedic placement that stayed with you after the shift was over?
   1. Possible probes: An experience where you felt a greater amount of stress? A callout that was particularly challenging emotionally because of the situation, or you identified with the people involved?
   2. How did the other paramedics who were also involved handle the incident, and did you talk about the experience later?

**Part A**

1. What emotions did you feel during the critical incident, and how did you cope with them? And how did you feel in the hours and days after?
   1. Probes: Did you feel better or worse? Did you continue to think about the incident?
2. What changes did you notice in yourself or your behaviour in the day and week after experiencing critical incidents during your placement?
   1. Probes: Was there a change in sleep, eating, drinking, exercise? What were they?
   2. How has the incident continued to have an impact, if any?
3. What made you feel better about the incident?
   1. Probes: talking to friend/family member? Stress management strategies like self-care? Using alcohol? Trying to forget about it?
4. In your opinion, what are the most effective coping strategies for managing the impacts of critical incidents in paramedic work?
   1. What were your observations of the professional paramedic crews and how they handle the stress and mental impact?
5. What kind of formal support did you receive during and after the critical incident (probe: VU Counselling, your own psychologist/counsellor, talking to a lecturer or placement coordinator at VU, Ambulance Victoria peer support, debriefing with AV crew and supervisors, calling a hotline)?
   1. What kind of informal support did you receive? (probe: talking to a friend, family member, or classmate, reading a website)

Probe - If you didn’t seek support, why not?

1. What resources or support systems do you think would be helpful for paramedic students to have access to during placement to manage the impacts of critical incidents?
   1. How much would paramedic students be willing to talk to a psychologist if they were impacted by an experience on placement?

**Part B**

1. When choosing paramedicine, what were your expectations regarding the traumatic or graphic nature of the incidents you would encounter?
   1. Did it affect your decision in any way? Were you fearful or anxious about the mental effects it has on paramedic? Why did you believe you would be able to cope with such confronting scenes?
2. Think back to before you ever had a placement. What were your expectations regarding placements?
   1. Probe: Can you recall any feelings of anxiety or concern leading up to your placements?
3. Before your placement, what type of mental preparation did you have for the confronting incidents that you were likely to encounter?
   1. Describe any formal/university provided preparations? Probe –possible psychological effects of paramedic work?
   2. In what ways did you use your networks outside of uni in order to prepare yourself?
   3. How much awareness did you have about counselling services (at uni or in the community, hotlines, etc)?
4. How would you describe your level of mental preparedness for your placement experiences?
   1. Did you have self-care skills, or coping mechanisms prior to your placements?
5. What are your recommendations about how VU and Ambulance Victoria could prepare students for the mental effects before they go on placement?
6. How much would paramedic students willing to talk to a psychologist before placement? Probe – like about effective coping should they have a difficult experience? Or to learn about PTSD?
