# Supplementary material for: Paramedicine students’ experiences on placement: Preparedness for the emotional impacts of witnessing trauma
Source: Research Square preprint supplement (doi:10.21203/rs.3.rs-5530877/v1), 2025-04-11
Supplement: Supplementary file 2 [file f3d75709bd1bb677348d732d.docx]

Paramedic wellbeing study: Interview distress protocol

Adapted from Draucker et al. (2009)

| Indications of distress | Follow-up questions | Participant response or behaviour | 1. Acute emotional distress or safety concern (Y/N)  2. Imminent danger (Y/N) |
| --- | --- | --- | --- |
| 1. High level of stress or emotional distress  2. Behaviours such as uncontrolled crying, trouble speaking, possible flashbacks | 1. Stop interview  2. “It’s okay”; “would you like to take a minute to regroup?”  3. Assess state:  “Tell me what your thoughts are.”  “What are your feelings now?”  “Do you feel able to go on with your day?”  4. “Do you feel safe?” if NO – consider: Is the distress beyond what would be normal for an interview about this topic |  |  |
| Indication they are thinking of hurting themselves | 1. Stop interview  2. “It’s okay”; “would you like to take a minute to regroup?”  3. Safety assessment  “Tell me what your thoughts are.”  “Do you intend to harm yourself?”  “How?”  “When?”  “Do you have the means?”  4. Consider if there is an imminent danger to self |  |  |

Level 1

If the participant’s reaction is expected, taking into account the topic and nature of the interview, allow the participant autonomy in deciding how to proceed: 1) stop the interview; 2) take a minute to regroup and resume; 3) continue.

Level 2

If the participant’s response is evaluated as acute distress or a safety concern (beyond what is expected) but NOT imminent danger:

1. Encourage participant to contact their personal mental health provider, VU student counselling, or the study psychologist
2. Provide contact details for Lifeline, Beyond Blue, in addition to above.
3. With the participant’s permission, offer to have someone from student counselling or the study psychologist check in with them to see if they are okay.
4. Discuss with the participant a friend, family member, or other supportive person that they could call.

Level 3

If participant is deemed to be in imminent danger:

1. Discuss with participant how to get to the emergency room (friend, family member who can take them?). If this cannot be arranged, dial 000 and ask for a welfare check or ambulance.
2. With the participant’s permission, offer to have someone from student counselling or the study psychologist check in with them to see if they are okay.
